# Supplementary material for: Fumonisin B1 (FB1) Induces Lamellar Separation and Alters Sphingolipid Metabolism of In Vitro Cultured Hoof Explants
Source: PubMed Central journal article supplement (PMC4848616; doi:10.3390/toxins8040089), 2016-03-24
Supplement: toxins-08-00089-s001.pdf [file toxins-08-00089-s001.pdf]

## Supplementary Materials: Fumonisin B<sub>1</sub> (FB<sub>1</sub>) Induces Lamellar Separation and Alters Sphingolipid Metabolism of *In Vitro* Cultured Hoof Explants

Nicole Reisinger \*, Ilse Dohnal, Veronika Nagl, Simone Schaumberger, Gerd Schatzmayr and Elisabeth Mayer

**Table S1.** Mean separation force (N) of explants incubated with FB<sub>1</sub> (0–10 µg/mL) for 48 h (*n* = 9).

| 48 h                    |          |      |                 |
|-------------------------|----------|------|-----------------|
| FB <sub>1</sub> (µg/mL) | Mean (N) | SD   | <i>p</i> -Value |
| 0                       | 14.4     | 7.5  | -               |
| 0.125                   | n.a.     | n.a. | n.a.            |
| 0.25                    | n.a.     | n.a. | n.a.            |
| 0.5                     | 10.1     | 4.3  | 0.415           |
| 1                       | 7.8      | 6.6  | 0.045           |
| 2.5                     | 7.7      | 3.7  | 0.083           |
| 5                       | 8.8      | 5.9  | 0.193           |
| 10                      | 11.8     | 6.6  | 0.834           |

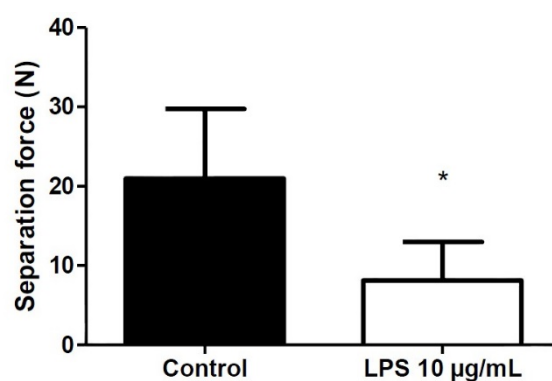

**Figure S1.** Comparison of the separation force of explants treated with 10 µg/mL LPS (positive control) to control explants (negative control). \* *p* < 0.05.
